# Supplementary material for: Association of Habitual Physical Activity With the Risk of All-Cause Mortality Among Chinese Adults: A Prospective Cohort Study
Source: PubMed Central journal article supplement (PMC9263353; doi:10.3389/fpubh.2022.919306), 2022-06-24
Supplement: Data_Sheet_1.pdf [file Data_Sheet_1.pdf]

## **Supplementary materials**

Table S1. The characteristics of participants by habitual physical activity

Table S2. Sensitivity analysis on associations of all-cause mortality with habitual physical activity and leisure-time physical activity by using new cut-off points

Table S3. Sensitivity analysis on the associations of all-cause mortality with physical activity by excluding participants who died within the first year (N=11956)

Table S4. Sensitivity analysis on the associations of all-cause mortality with physical activity by excluding participants aged 80 years or more (N=11483)

Table S5. Sensitivity analysis on the associations of all-cause mortality with physical activity by excluding participants who died due to traffic accidents and injuries (N=11985)

**Table S1. The characteristics of participants by habitual physical activity**

| Characteristic                                   | Total<br>(N=11994) | Low HPA<br>(N=4020) | Moderate HPA<br>(N=3976) | High HPA<br>(N=3998) | <i>P</i> value |
|--------------------------------------------------|--------------------|---------------------|--------------------------|----------------------|----------------|
| Age, years, mean (S.D.)                          | 58.67 (11.78)      | 59.30 (12.94)       | 58.07 (11.76)            | 58.62 (10.49)        | 0.010*         |
| Body mass index, kg/m <sup>2</sup> , mean (S.D.) | 23.98 (3.53)       | 24.05 (3.64)        | 24.01 (3.47)             | 23.87 (3.46)         | 0.022*         |
| Sex, N (%)                                       |                    |                     |                          |                      | <0.001†        |
| Male                                             | 4194 (34.97)       | 1948 (48.46)        | 1316 (33.10)             | 930 (23.26)          |                |
| Female                                           | 7800 (65.03)       | 2072 (51.54)        | 2660 (66.90)             | 3068 (76.74)         |                |
| Education, N (%)                                 |                    |                     |                          |                      | <0.001†        |
| < high school                                    | 7518 (62.68)       | 2703 (67.24)        | 2498 (62.83)             | 2317 (57.95)         |                |
| High school                                      | 2914 (24.30)       | 855 (21.27)         | 942 (23.69)              | 1117 (27.94)         |                |
| > high school                                    | 1562 (13.02)       | 462 (11.49)         | 536 (13.48)              | 564 (14.11)          |                |
| Marital status, N (%)                            |                    |                     |                          |                      | 0.159†         |
| Married                                          | 10202 (85.06)      | 3385 (84.20)        | 3392 (85.31)             | 3425 (85.67)         |                |
| Others                                           | 1792 (14.94)       | 635 (15.80)         | 584 (14.69)              | 573 (14.33)          |                |
| Smoking                                          |                    |                     |                          |                      | <0.001†        |
| Never                                            | 9438 (78.69)       | 2790 (69.40)        | 3206 (80.63)             | 3442 (86.09)         |                |
| Former                                           | 718 (5.99)         | 288 (7.16)          | 228 (5.73)               | 202 (5.05)           |                |
| Current                                          | 1838 (15.32)       | 942 (23.43)         | 542 (13.63)              | 354 (8.85)           |                |
| Alcohol drinking                                 |                    |                     |                          |                      | <0.001†        |
| Never                                            | 9435 (78.66)       | 3032 (75.42)        | 3166 (79.63)             | 3237 (80.97)         |                |
| Occasionally                                     | 1835 (15.30)       | 623 (15.50)         | 615 (15.47)              | 597 (14.93)          |                |
| Frequent                                         | 724 (6.04)         | 365 (9.08)          | 195 (4.90)               | 164 (4.10)           |                |
| Hypertension                                     |                    |                     |                          |                      | <0.001†        |
| Yes                                              | 3796 (31.65)       | 1361 (33.86)        | 1253 (31.51)             | 1182 (29.56)         |                |
| No                                               | 8198 (68.35)       | 2659 (66.14)        | 2723 (68.49)             | 2816 (70.44)         |                |
| Dyslipidemia                                     |                    |                     |                          |                      | 0.538†         |
| Yes                                              | 8426 (70.25)       | 2798 (69.60)        | 2809 (70.65)             | 2819 (70.51)         |                |
| No                                               | 3568 (29.75)       | 1222 (30.40)        | 1167 (29.35)             | 1179 (29.49)         |                |
| Diabetes                                         |                    |                     |                          |                      | 0.872†         |
| Yes                                              | 982 (8.19)         | 332 (8.26)          | 330 (8.30)               | 320 (8.00)           |                |
| No                                               | 11012 (91.81)      | 3688 (91.74)        | 3646 (91.70)             | 3678 (92.00)         |                |
| COPD                                             |                    |                     |                          |                      | 0.037†         |
| Yes                                              | 674 (5.62)         | 256 (6.37)          | 213 (5.36)               | 205 (5.13)           |                |
| No                                               | 11320 (94.38)      | 3764 (93.63)        | 3763 (94.64)             | 3793 (94.87)         |                |
| Cardiovascular disease                           |                    |                     |                          |                      | 0.060†         |
| Yes                                              | 599 (4.99)         | 227 (5.65)          | 190 (4.78)               | 182 (4.55)           |                |
| No                                               | 11395 (95.01)      | 3793 (94.35)        | 3786 (95.22)             | 3816 (95.45)         |                |

Abbreviations: COPD, chronic obstructive pulmonary disease.

\* *P* values of continuous variables were from one-way analysis of variance;

† *P* values of categorical variables were from chi-square tests.

**Table S2. Sensitivity analysis on associations of all-cause mortality with Habitual physical activity and Leisure-time physical activity by using new cut-off points**

|                                        | Deaths/Person-years | Crude HR (95% CI) † | Adjusted HR (95% CI) ‡ | Adjusted HR (95% CI) § |
|----------------------------------------|---------------------|---------------------|------------------------|------------------------|
| <b>Habitual physical activity*</b>     |                     |                     |                        |                        |
| ≤10 MET-h/week                         | 38/4039             | 1.00                | 1.00                   | /                      |
| 10-50 MET-h/week                       | 125/20659           | 0.64 (0.45, 0.92)   | 0.82 (0.57, 1.19)      | /                      |
| >50 MET-h/week                         | 45/13017            | 0.37 (0.24, 0.56)   | 0.61 (0.39, 0.95)      | /                      |
| <i>P</i> for trend                     |                     | <0.001              | 0.024                  | /                      |
| Every 10 MET-h/week increment          |                     | 0.89 (0.85, 0.94)   | 0.94 (0.90, 0.99)      | /                      |
| <b>Leisure-time physical activity*</b> |                     |                     |                        |                        |
| ≤10 MET-h/week                         | 41/5501             | 1.00                | 1.00                   | 1.00                   |
| 10-50 MET-h/week                       | 125/20586           | 0.81 (0.57, 1.16)   | 0.84 (0.60, 1.21)      | 0.86 (0.60, 1.23)      |
| >50 MET-h/week                         | 42/11627            | 0.48 (0.31, 0.74)   | 0.62 (0.40, 0.96)      | 0.63 (0.41, 0.98)      |
| <i>P</i> for trend                     |                     | <0.001              | 0.038                  | 0.048                  |
| Every 10 MET-h/week increment          |                     | 0.91 (0.87, 0.96)   | 0.94 (0.90, 0.99)      | 0.94 (0.90, 0.99)      |

\*Physical activity was categorized as ≤10 MET-h/week, 10-50 MET-h/week, >50 MET-h/week, corresponding to less than 150 minutes per week, 150-750 minutes per week, and more than 750 minutes per week of moderate intensity physical activity.

† Crude HR, without any adjustment.

‡ Adjustment for age, sex, education, marital status, smoking, alcohol drinking, body mass index, physician-diagnosed hypertension, diabetes, dyslipidemia, cardiovascular disease, and chronic obstructive pulmonary disease;

§ Further adjustment for leisure-time physical activity (for commute activity) or commute activity (for leisure-time physical activity).

**Table S3. Sensitivity analysis on the associations of all-cause mortality with physical activity by excluding participants who died within the first year (N=11956)**

|                                       | Deaths/Person-years | Crude HR (95% CI) * | Adjusted HR (95% CI) † | Adjusted HR3 (95% CI) ‡ |
|---------------------------------------|---------------------|---------------------|------------------------|-------------------------|
| <b>Habitual physical activity</b>     |                     |                     |                        |                         |
| Low ( $\leq 24.5$ MET-h/week)         | 83/12524            | 1.00                | 1.00                   | /                       |
| Moderate (24.5 - 51.1 MET-h/week)     | 52/12520            | 0.62 (0.44, 0.88)   | 0.84 (0.59, 1.20)      | /                       |
| High ( $> 51.1$ MET-h/week)           | 35/12650            | 0.41 (0.28, 0.62)   | 0.63 (0.42, 0.95)      | /                       |
| <i>P</i> for trend                    |                     | $<0.001$            | 0.027                  | /                       |
| Every 10 MET-h/week increment         |                     | 0.89 (0.84, 0.94)   | 0.94 (0.89, 0.99)      | /                       |
| <b>Leisure-time physical activity</b> |                     |                     |                        |                         |
| Low ( $\leq 22.4$ MET-h/week)         | 70/12826            | 1.00                | 1.00                   | 1.00                    |
| Moderate (22.4 – 46.9 MET-h/week)     | 60/12377            | 0.88 (0.63, 1.25)   | 0.84 (0.59, 1.19)      | 0.84 (0.60, 1.19)       |
| High ( $> 46.9$ MET-h/week)           | 40/12490            | 0.58 (0.40, 0.86)   | 0.67 (0.45, 0.99)      | 0.68 (0.46, 1.00)       |
| <i>P</i> for trend                    |                     | 0.006               | 0.047                  | 0.062                   |
| Every 10 MET-h/week increment         |                     | 0.90 (0.86, 0.96)   | 0.93 (0.89, 0.99)      | 0.94 (0.89, 0.99)       |
| <b>Commute activity</b>               |                     |                     |                        |                         |
| Retirement (0 MET-h/week)             | 131/21192           | 1.00                | 1.00                   | 1.00                    |
| Low ( $< 10$ MET-h/week)              | 28/12467            | 0.37 (0.25, 0.55)   | 1.52 (0.97, 2.38)      | 1.41 (0.89, 2.22)       |
| High ( $\geq 10$ MET-h/week)          | 11/4034             | 0.44 (0.24, 0.81)   | 2.19 (1.12, 4.27)      | 2.00 (1.00, 3.93)       |
| <i>P</i> for trend                    |                     | 0.002               | 0.016                  | 0.038                   |
| Every 10 MET-h/week increment         |                     | 0.58 (0.40, 0.85)   | 1.24 (0.97, 1.59)      | 1.21 (0.94, 1.56)       |

\*Crude HR, without any adjustment.

†Adjustment for age, sex, education, marital status, smoking, alcohol drinking, body mass index, physician-diagnosed hypertension, diabetes, dyslipidemia, cardiovascular disease, and chronic obstructive pulmonary disease;

‡ Further adjustment for leisure-time physical activity (for commute activity) or commute activity (for leisure-time physical activity).

**Table S4. Sensitivity analysis on the associations of all-cause mortality with physical activity by excluding participants aged 80 years or more (N=11483)**

|                                       | Deaths/Person-years | Crude HR (95% CI) * | Adjusted HR (95% CI) † | Adjusted HR (95% CI) ‡ |
|---------------------------------------|---------------------|---------------------|------------------------|------------------------|
| <b>Habitual physical activity</b>     |                     |                     |                        |                        |
| Low ( $\leq 24.5$ MET-h/week)         | 71/11969            | 1.00                | 1.00                   | /                      |
| Moderate (24.5 - 51.1 MET-h/week)     | 51/12067            | 0.71 (0.50, 1.02)   | 0.88 (0.61, 1.27)      | /                      |
| High ( $> 51.1$ MET-h/week)           | 36/12137            | 0.50 (0.33, 0.74)   | 0.68 (0.45, 0.99)      | /                      |
| <i>P</i> for trend                    |                     | $<0.001$            | 0.047                  | /                      |
| Every 10 MET-h/week increment         |                     | 0.91 (0.86, 0.96)   | 0.94 (0.89, 0.99)      | /                      |
| <b>Leisure-time physical activity</b> |                     |                     |                        |                        |
| Low ( $\leq 22.4$ MET-h/week)         | 62/12209            | 1.00                | 1.00                   | 1.00                   |
| Moderate (22.4 – 46.9 MET-h/week)     | 55/11837            | 0.91 (0.63, 1.31)   | 0.81 (0.56, 1.17)      | 0.81 (0.56, 1.17)      |
| High ( $> 46.9$ MET-h/week)           | 41/12128            | 0.66 (0.45, 0.98)   | 0.67 (0.45, 1.01)      | 0.68 (0.46, 1.03)      |
| <i>P</i> for trend                    |                     | 0.040               | 0.058                  | 0.068                  |
| Every 10 MET-h/week increment         |                     | 0.93 (0.88, 0.98)   | 0.94 (0.89, 0.99)      | 0.94 (0.89, 0.99)      |
| <b>Commute activity</b>               |                     |                     |                        |                        |
| Retirement (0 MET-h/week)             | 117/19755           | 1.00                | 1.00                   | 1.00                   |
| Low ( $< 10$ MET-h/week)              | 29/12402            | 0.40 (0.27, 0.60)   | 1.34 (0.85, 2.13)      | 1.26 (0.79, 2.01)      |
| High ( $\geq 10$ MET-h/week)          | 12/4017             | 0.50 (0.28, 0.91)   | 1.94 (1.01, 3.73)      | 1.79 (0.93, 3.48)      |
| <i>P</i> for trend                    |                     | 0.007               | 0.046                  | 0.084                  |
| Every 10 MET-h/week increment         |                     | 0.66 (0.46, 0.94)   | 1.15 (0.91, 1.46)      | 1.13 (0.89, 1.44)      |

\*Crude HR, without any adjustment.

†Adjustment for age, sex, education, marital status, smoking, alcohol drinking, body mass index, physician-diagnosed hypertension, diabetes, dyslipidemia, cardiovascular disease, and chronic obstructive pulmonary disease;

‡Further adjustment for leisure-time physical activity (for commute activity) or commute activity (for leisure-time physical activity).

**Table S5. Sensitivity analysis on the associations of all-cause mortality with physical activity by excluding participants who died due to traffic accidents and injuries (N=11985)**

|                                       | Deaths/Person-years | Crude HR (95% CI) * | Adjusted HR (95% CI) † | Adjusted HR (95% CI) ‡ |
|---------------------------------------|---------------------|---------------------|------------------------|------------------------|
| <b>Habitual physical activity</b>     |                     |                     |                        |                        |
| Low ( $\leq 24.5$ MET-h/week)         | 96/12524            | 1.00                | 1.00                   | /                      |
| Moderate (24.5 - 51.1 MET-h/week)     | 60/12514            | 0.62 (0.45, 0.86)   | 0.86 (0.62, 1.19)      | /                      |
| High ( $> 51.1$ MET-h/week)           | 43/12662            | 0.44 (0.31, 0.63)   | 0.68 (0.47, 0.99)      | /                      |
| <i>P</i> for trend                    |                     | $<0.001$            | 0.046                  | /                      |
| Every 10 MET-h/week increment         |                     | 0.89 (0.85, 0.94)   | 0.95 (0.90, 0.99)      | /                      |
| <b>Leisure-time physical activity</b> |                     |                     |                        |                        |
| Low ( $\leq 22.4$ MET-h/week)         | 82/12826            | 1.00                | 1.00                   | 1.00                   |
| Moderate (22.4 – 46.9 MET-h/week)     | 68/12378            | 0.86 (0.62, 1.18)   | 0.83 (0.60, 1.15)      | 0.83 (0.60, 1.15)      |
| High ( $> 46.9$ MET-h/week)           | 49/12496            | 0.61 (0.43, 0.87)   | 0.72 (0.50, 1.03)      | 0.72 (0.51, 1.04)      |
| <i>P</i> for trend                    |                     | 0.006               | 0.070                  | 0.084                  |
| Every 10 MET-h/week increment         |                     | 0.92 (0.87, 0.96)   | 0.94 (0.90, 0.99)      | 0.95 (0.90, 0.99)      |
| <b>Commute activity</b>               |                     |                     |                        |                        |
| Retirement (0 MET-h/week)             | 157/21203           | 1.00                | 1.00                   | 1.00                   |
| Low ( $< 10$ MET-h/week)              | 31/12465            | 0.34 (0.23, 0.50)   | 1.31 (0.85, 2.00)      | 1.22 (0.79, 1.88)      |
| High ( $\geq 10$ MET-h/week)          | 11/4032             | 0.37 (0.20, 0.68)   | 1.63 (0.85, 3.14)      | 1.50 (0.77, 2.91)      |
| <i>P</i> for trend                    |                     | $<0.001$            | 0.121                  | 0.213                  |
| Every 10 MET-h/week increment         |                     | 0.52 (0.36, 0.76)   | 1.15 (0.90, 1.47)      | 1.12 (0.86, 1.45)      |

\*Crude HR, without any adjustment.

†Adjustment for age, sex, education, marital status, smoking, alcohol drinking, body mass index, physician-diagnosed hypertension, diabetes, dyslipidemia, cardiovascular disease, and chronic obstructive pulmonary disease;

‡ Further adjustment for leisure-time physical activity (for commute activity) or commute activity (for leisure-time physical activity).
